# Supplementary material for: Nonlinear transmittance and optical power limiting in magnesium ferrite nanoparticles: effects of laser pulsewidth and particle size
Source: Royal Society of Chemistry journal article supplement (doi:10.1039/c6ra15788b), 2016-01-01
Supplement: c6ra15788b1.pdf [file c6ra15788b1.pdf]

*Electronic Supplementary Information (ESI)*

**Nonlinear transmittance and optical power limiting in Magnesium ferrite**

**nanoparticles: effects of laser pulsewidth and particle size**

Sreekanth Perumbilavil,<sup>‡a,b</sup> Kishore Sridharan,<sup>\*c</sup> Ann Rose Abraham,<sup>b</sup> Harsha P Janardhanan,<sup>b</sup>  
Nandakumar Kalarikkal<sup>b,d</sup> and Reji Philip<sup>\*c</sup>

<sup>a</sup> *Ultrafast and Nonlinear Optics Lab, Light and Matter Physics Group, Raman Research Institute, C.V. Raman Avenue, Sadashivanagar, Bangalore 560080, India. Email: reji@rri.res.in; Tel: +91 9480836164*

<sup>b</sup> *School of Pure and Applied Physics, Mahatma Gandhi University, Kottayam 686560, India*

<sup>c</sup> *Department of Physics, National Institute of Technology Karnataka, P.O. Srinivasnagar, Surathkal, Mangaluru 575025, India. Email: kishore@nitk.edu.in; Tel: +91 824 2473275*

<sup>d</sup> *International and Interuniversity Centre for Nanoscience and Nanotechnology, Mahatma Gandhi University, Kottayam 686560, India*

<sup>‡</sup> *Present address: Optics Laboratory, Tampere University of Technology, FI-33101 Tampere, Finland*

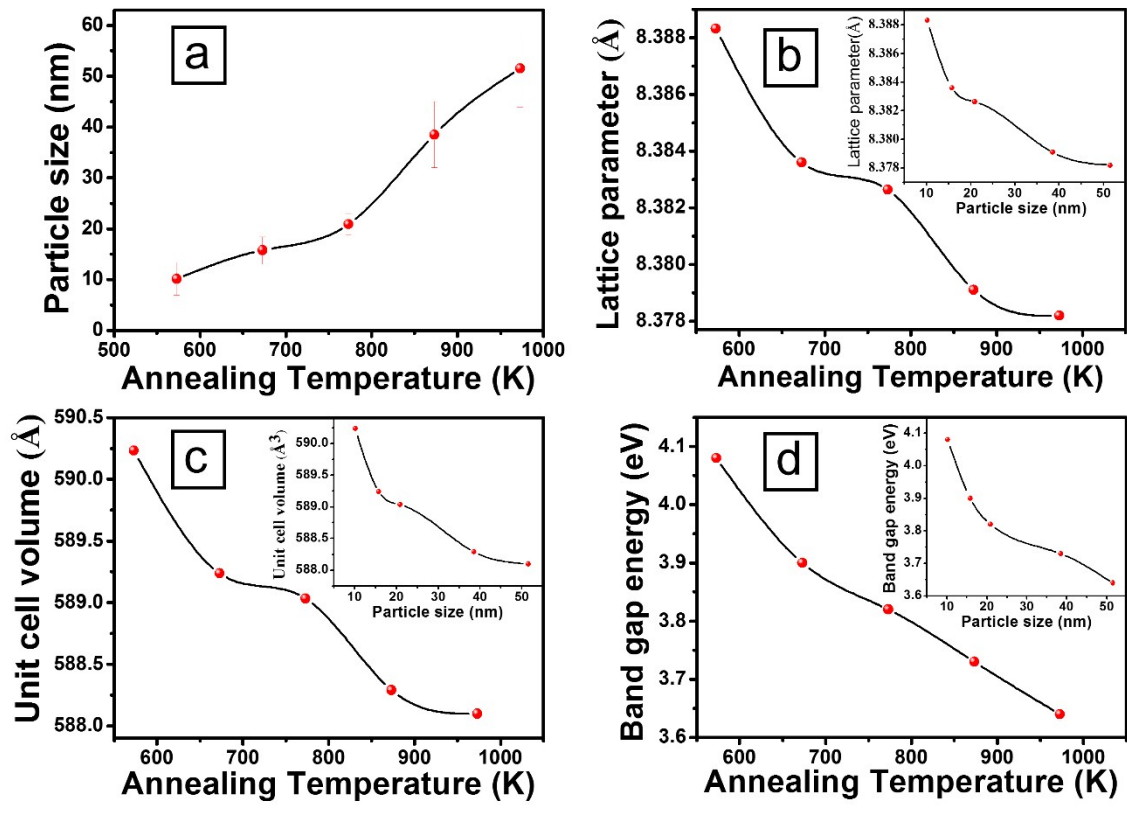

**Fig. S1** (a) Plot showing the variation of average particle size (calculated from the dominant XRD peaks using Debye-Scherer equation) as a function of annealing temperature. (b) Plot showing the decrease in lattice size as a function of annealing temperature and particle size (inset). (c) Plot showing the decrease in unit cell volume as a function of annealing temperature and particle size (inset). (d) Plot showing the decrease in band gap energy (calculated using Tauc relation) as a function of annealing temperature and particle size (inset).
